# Supplementary material
Source: HighWire-hosted journal article supplement (https://www.cmajopen.ca/highwire/filestream/89063/field_highwire_adjunct_files/1/open-2021-0273-2-at.pdf)
Supplement: open-2021-0273-2-at.pdf [file open-2021-0273-2-at.pdf]

**Supplemental Table 1.** Sociodemographics of study participants stratified based on their vaccination status.

|                                                                | Overall n=603 | Vaccination or intention to vaccinate n=505 |                               | Not vaccinated n=98 | P-value* |
|----------------------------------------------------------------|---------------|---------------------------------------------|-------------------------------|---------------------|----------|
|                                                                |               | Vaccinated n=474                            | Would accept vaccination n=31 |                     |          |
| Age, years – mean±SD                                           | 33.5 ± 5.5    | 33.6 ± 5.8                                  | 30.8 ± 4.3                    | 32.9 ± 4.7          | 0.32     |
| Gestational age, weeks – mean±SD                               | 22.5 ± 9.3    | 21.8 ± 9.4                                  | 25.1 ± 7.8                    | 25.7 ± 8.8          | <0.001   |
| Body mass index**, kg/m <sup>2</sup> – mean±SD                 | 24.4 ± 5.4    | 24.4 ± 5.3                                  | 24.1 ± 5.1                    | 25.0 ± 5.9          | 0.55     |
| Trimester of pregnancy at the time of survey completion – n(%) |               |                                             |                               |                     |          |
| 1 <sup>st</sup> trimester                                      | 98 (16.3%)    | 87 (18.4%)                                  | 2 (6.5%)                      | 9 (9.2%)            |          |
| 2 <sup>nd</sup> trimester                                      | 236 (39.1%)   | 191 (40.3%)                                 | 12 (38.7%)                    | 33 (33.7%)          |          |
| 3 <sup>rd</sup> trimester                                      | 269 (44.6%)   | 196 (41.4%)                                 | 17 (54.8%)                    | 56 (57.1%)          | 0.02     |
| Received influenza vaccine in 2020-2021 – n(%)                 | 215 (35.7%)   | 198 (41.8%)                                 | 7 (22.6%)                     | 10 (10.2%)          | <0.001   |
| Healthcare professional ensuring pregnancy follow-up*** – n(%) |               |                                             |                               |                     |          |
| Family physician                                               | 187 (31.0%)   | 152 (32.0%)                                 | 6 (19.4%)                     | 29 (29.6%)          |          |
| Obstetrician                                                   | 388 (64.2%)   | 300 (63%)                                   | 22 (71.0%)                    | 66 (67.4%)          |          |
| Midwife                                                        | 56 (9.3%)     | 44 (8.7%)                                   | 4 (12.9%)                     | 8 (8.2%)            |          |
| Nurse Practitioner                                             | 37 (6.1%)     | 31 (6.5%)                                   | 1 (3.2%)                      | 5 (5.1%)            |          |
| Years of education - mean±SD                                   | 17.0 ± 3.9    | 17.4 ± 3.7                                  | 16.0 ± 4.4                    | 15.0 ± 4.7          | <0.001   |
| Employment status – n(%)                                       |               |                                             |                               |                     |          |
| Employed                                                       | 451 (74.8%)   | 360 (75.9%)                                 | 26 (83.9%)                    | 65 (66.3%)          |          |
| Self-employed                                                  | 57 (9.5%)     | 50 (10.5%)                                  | -                             | 7 (7.1%)            |          |
| Student or Intern                                              | 37 (6.1%)     | 29 (6.1%)                                   | 3 (9.7%)                      | 5 (5.1%)            |          |
| Unemployed                                                     | 22 (3.6%)     | 10 (2.1%)                                   | 1 (3.2%)                      | 11 (11.2%)          |          |
| On welfare                                                     | 24 (4.0%)     | 18 (3.8%)                                   | -                             | 6 (6.1%)            |          |
| Prefer not to answer                                           | 12 (2.0%)     | 7 (1.5%)                                    | 1 (3.2%)                      | 4 (4.1%)            | -        |
| Ethnic background                                              |               |                                             |                               |                     |          |
| Aboriginal (North American Indians, Métis or Inuit [Inuk])     | 3 (0.5%)      | 3 (0.6%)                                    | -                             | -                   |          |
| Asian                                                          | 11 (1.8%)     | 5 (1.1%)                                    | 1 (3.2%)                      | 5 (5.1%)            |          |
| Black                                                          | 14 (2.3%)     | 7 (1.5%)                                    | -                             | 7 (7.1%)            |          |
| Caucasian/white                                                | 538 (89.2%)   | 437 (92.2%)                                 | 27 (87.1%)                    | 74 (75.5%)          |          |
| Hispanic                                                       | 13 (2.2%)     | 10 (2.1%)                                   | 2 (6.5%)                      | 1 (1.0%)            |          |
| Other                                                          | 10 (1.7%)     | 3 (0.6%)                                    | -                             | 7 (7.1%)            |          |
| Prefer not to answer                                           | 15 (2.3%)     | 9 (1.9%)                                    | 1 (3.2%)                      | 4 (4.1%)            | -        |
| Living situation                                               |               |                                             |                               |                     |          |
| Living alone or single mother                                  | 14 (2.3%)     | 12 (2.5%)                                   | 1 (3.2%)                      | 1 (1.0%)            |          |
| Living with a partner or married                               | 578 (95.9%)   | 456 (96.2%)                                 | 30 (96.8%)                    | 92 (95.9%)          |          |
| Living with parents or family                                  | 11 (1.8%)     | 6 (1.30%)                                   | -                             | 5 (5.1%)            | -        |
| Area of residence                                              |               |                                             |                               |                     |          |
| Urban                                                          | 271 (44.9%)   | 215 (45.4%)                                 | 11 (35.5%)                    | 45 (45.9%)          |          |
| Suburban                                                       | 256 (42.5%)   | 202 (42.6%)                                 | 18 (58.1%)                    | 36 (36.7%)          |          |
| Rural                                                          | 76 (12.6%)    | 57 (12.0%)                                  | 2 (6.5%)                      | 17 (17.4%)          | 0.20     |
| Household income, CAD                                          |               |                                             |                               |                     |          |
| <\$60,000                                                      | 78 (12.9%)    | 46 (9.7%)                                   | 6 (19.4%)                     | 26 (26.5%)          |          |
| \$60,001-\$90,000                                              | 83 (13.8%)    | 66 (13.9%)                                  | 2 (6.5%)                      | 15 (15.3%)          |          |
| \$90,001-\$120,000                                             | 125 (20.7%)   | 103 (21.7%)                                 | 7 (22.6%)                     | 15 (15.3%)          |          |
| \$120,001-\$150,000                                            | 109 (18.1%)   | 88 (18.6%)                                  | 7 (22.6%)                     | 14 (14.3%)          |          |
| >\$150,001                                                     | 172 (28.5%)   | 150 (31.6%)                                 | 7 (22.6%)                     | 15 (15.3%)          | <0.001   |
| Prefer not to answer                                           | 36 (6.0%)     | 21 (4.4%)                                   | 2 (6.45%)                     | 13 (11.59%)         |          |

\* P values compare the three vaccination status categories and were considered significant if they were p&lt;0.05

\*\* Measured using pre-pregnancy weight
